# Supplementary material for: Catastrophic costs potentially averted by tuberculosis control in India and South Africa: a modelling study
Source: PubMed Central journal article supplement (PMC5640802; doi:10.1016/s2214-109x(17)30341-8), 2017-10-09
Supplement: mmc1.pdf [file mmc1.pdf]

# THE LANCET

## Global Health

### Supplementary appendix

This appendix formed part of the original submission and has been peer reviewed.  
We post it as supplied by the authors.

Supplement to: Verguet S, Riumallo-Herl C, Gomez GB, et al. Catastrophic costs potentially averted by tuberculosis control in India and South Africa: a modelling study. *Lancet Glob Health* 2017; **5**: e1123–32.

## Supplementary webappendix

Catastrophic costs averted by TB control: findings for India and South Africa  
from a modeling study

by

Stéphane Verguet, Carlos Riumallo-Herl, Gabriela B. Gomez, Nicolas A. Menzies,  
Rein M.J.G. Houben, Tom Sumner, Marek Lalli, Richard G. White, Joshua A. Salomon,  
Ted Cohen, Nicola Foster, Susmita Chatterjee, Sedona Sweeney, Inés Garcia Baena,  
Knut Lönnroth, Diana E. Weil, Anna Vassall

### 1. Description of the TB transmission models used.

Table S1 describes the characteristics of the two compartmental models of TB transmission used in our analysis, as developed by Menzies and colleagues (Harvard)<sup>1</sup> and the TB Impact Model and Estimates (TIME) modeling group.<sup>2</sup>

**Table S1.** Description of the two TB transmission models used.

| <b>Model</b>   | <b>Type</b>                       | <b>Calibration</b> | <b>Age structure</b> | <b>Sex strata</b> | <b>Population strata</b>                                                       |
|----------------|-----------------------------------|--------------------|----------------------|-------------------|--------------------------------------------------------------------------------|
| <b>Harvard</b> | Deterministic compartmental model | Bayesian           | Single age group     | No                | MDR-TB, healthcare sector, TB treatment history, HIV/ART/CD4 status (9 strata) |
| <b>TIME</b>    | Deterministic compartmental model | Manual             | < 15 and 15+ years   | No                | MDR-TB, TB treatment history, HIV/ART/CD4 status (11 strata)                   |

DS = drug-sensitive, MDR = multi-drug-resistant. Source: Houben and colleagues.<sup>3</sup>

## 2. Description of the TB care and prevention framework.

Figure S1 describes the patient care pathway from disease to completion of treatment (blue boxes and arrows). Areas affected for enhancing current TB programme activities (i.e. intervention scenarios) are shown in red boxes and arrows, with the number (1, 2, or 3) to link them to activities in table 1 in the main text.

**Figure S1.** Description of the TB care and prevention framework. Adapted from Houben and colleagues.<sup>3</sup>

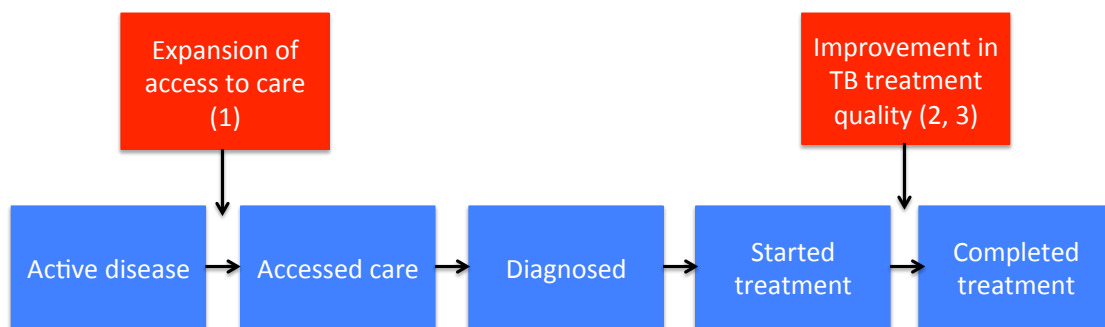

### **3. Estimation of patient-incurred costs**

We reproduce below from Menzies and colleagues<sup>4</sup> the detailed inputs used in the estimation of the patient-incurred costs for both current services (i.e. base-case) and intervention services (i.e. scenarios) in India (tables S2-S3) and South Africa (tables S4-S5). We report on the patient-incurred costs as well as on the corresponding model outputs used to multiply these unit costs for patient-incurred costs.

**Table S2.** Unit costs for patient-incurred costs, current (base-case) services (India, US\$ 2014).

| Unit cost                   | Type | Model output                          | Value (US\$) | Comment                    | Reference |
|-----------------------------|------|---------------------------------------|--------------|----------------------------|-----------|
| <b>Diagnosis</b>            |      |                                       |              |                            |           |
| c_DST                       | P_DM | Number of DST events                  | \$0.6        | Twice treatment cost visit | [5,6]     |
| c_DST                       | P_DO | Number of DST events                  | \$0.03       | Twice treatment cost visit | [5,6]     |
| c_DST                       | P_I  | Number of DST events                  | \$0.4        | Twice treatment cost visit | [5,6]     |
| <b>First line treatment</b> |      |                                       |              |                            |           |
| c_1st_line_all              | P_DM | Number of first-line treatment-months | \$12.2       | Per month                  | [5,6]     |
| c_1st_line_all              | P_DO | Number of first-line treatment-months | \$0.7        | Per month                  | [5,6]     |
| c_1st_line_all              | P_I  | Number of first-line treatment-months | \$8.4        | Per month                  | [5,6]     |
| <b>MDR treatment</b>        |      |                                       |              |                            |           |
| c_MDR_reg                   | P_DM | Number of MDR treatment-months        | \$12.2       | Per month (as first-line)  | [5,6]     |
| c_MDR_reg                   | P_DO | Number of MDR treatment-months        | \$0.7        | Per month (as first-line)  | [4,6]     |
| c_MDR_reg                   | P_I  | Number of MDR treatment-months        | \$8.4        | Per month (as first-line)  | [5,6]     |

DST, drug sensitivity test; MDR, multi-drug-resistance; P\_DM, patient costs– direct medical; P\_DO, patient costs–direct other; P\_I, patient costs–indirect. Note: drug-sensitive TB care (first-line) implies six months of treatment, whereas MDR-TB care implies twenty-four months of treatment.

**Table S3.** Unit costs for patient-incurred costs, intervention services (intervention scenarios) (India, US\$ 2014).

| Unit cost           | Type | Model output                          | Value  | Comment                                                                 | Reference |
|---------------------|------|---------------------------------------|--------|-------------------------------------------------------------------------|-----------|
| c_2b_DS_incentives  | P_DO | Number of first-line treatment-months | -\$9.2 | Social support for whole treatment of US\$35, plus US\$20 for transport | [7]       |
| c_2b_DS_nutrition   | P_DO | Number of first-line treatment-months | -\$4.2 | US\$25 for nutritional support cost                                     | [7]       |
| c_2c_MDR_incentives | P_DO | Number of MDR treatment-months        | -\$9.2 | As with first-line treatment (per month)                                | [7]       |
| c_2c_MDR_nutrition  | P_DO | Number of MDR treatment-months        | -\$4.2 | As with first-line treatment (per month)                                | [7]       |

2b–improve drug-sensitive (DS) treatment outcomes (from 75% to 85%). Patient side: incentives. Provider side: link to social welfare (including nutrition).  
2c–improve multi-drug-resistant (MDR) treatment outcomes (from 48% to 67%). Patient side: incentives. Provider side: link to social welfare (including nutrition).

Note: drug-sensitive TB care (first-line) implies six months of treatment, whereas MDR-TB care implies twenty-four months of treatment.

**Table S4.** Unit costs for patient-incurred costs, current services (base-case) (South Africa, US\$ 2014).

| Unit cost                   | Type | Model output                          | Value (US\$) | Comment                                                            | Reference |
|-----------------------------|------|---------------------------------------|--------------|--------------------------------------------------------------------|-----------|
| <b>First line treatment</b> |      |                                       |              |                                                                    |           |
| c_1st_line_all              | P_DM | Number of first-line treatment-months | \$8.0        | Per month                                                          | [8]       |
| c_1st_line_all              | P_DO | Number of first-line treatment-months | \$10.2       | Per month (includes loan interest)                                 | [8]       |
| c_1st_line_all              | P_I  | Number of first-line treatment-months | \$20.2       | Per month (reported income loss) for patient, carers and guardian  | [8]       |
| <b>MDR treatment</b>        |      |                                       |              |                                                                    |           |
| c_MDR_reg                   | P_DM | Number of MDR treatment-months        | \$1.2        | Per month                                                          | [9]       |
| c_MDR_reg                   | P_DO | Number of MDR treatment-months        | \$11.4       | Per month (includes loan interest)                                 | [9]       |
| c_MDR_reg                   | P_I  | Number of MDR treatment-months        | \$110.4      | Per month (reported income loss) for patient, carers, and guardian | [9]       |

MDR, multi-drug-resistance; P\_DM, patient costs–direct medical; P\_DO, patient costs–direct other; P\_I, patient costs– indirect.

Note: drug-sensitive TB care (first-line) implies six months of treatment, whereas MDR-TB care implies twenty-four months of treatment.

**Table S5.** Unit costs for patient-incurred costs, intervention services (intervention scenarios) (South Africa, US\$ 2014).

| Unit cost           | Type | Model output | Value (US\$) | Comment                                                                                        | Reference |
|---------------------|------|--------------|--------------|------------------------------------------------------------------------------------------------|-----------|
| c_1b_TB_symp_screen | P_DM | Per event    | \$0          | Assumed to be zero, as part of another visit                                                   | N/A       |
| c_1b_TB_symp_screen | P_DO | Per event    | \$0          | Assumed to be zero, as part of another visit                                                   | N/A       |
| c_1b_TB_symp_screen | P_I  | Per event    | \$0.16       | Mean monthly income in XTEND study group, assumed time is four minutes, plus a six-minute wait | [8,10]    |

P\_DM, patient costs–direct medical; P\_DO, patient costs–direct other; P\_I, patient costs–indirect.

1b–transfer of patients from low to high quality care settings (low quality reduced from 20% to 10%).

Notes: drug-sensitive TB care (first-line) implies six months of treatment, whereas MDR-TB care implies twenty-four months of treatment.

Screen individuals who visit the health care system for TB symptoms, i.e. intensified case finding. The method will involve a person standing at a funnel point in the clinic and asking patients whether they have any TB symptoms (i.e. verbal screening). The numbers of individuals screened would ensure that 100% of unique individuals are approached by screeners, even if some then refuse or cannot give sputum. It is possible to identify unique individuals in antiretroviral therapy care, but not in general care.



#### 4. Mathematical derivations for the estimation of TB-related catastrophic costs

This section describes the methods we used for estimating the level and distribution (across income quintiles) of the number of cases of TB-related catastrophic costs.

In each country, we divided the population into five income groups  $J$ , and we denoted:

- $y$ , the household income;
- $c_J$ , the costs incurred by the patient and thus his or her household.

We first allocated the number of cases of TB treated in each intervention scenario (1-3 in the main text), and given by the Harvard model<sup>1</sup> and the TIME model,<sup>2</sup> per income quintile  $J$ :

$$TxC_J = \frac{1}{5} * N * AP_J, \quad (1)$$

where  $N$  was the total number of TB cases treated as given by the Harvard/TIME models,  $AP_J$  was the combined adjusted risk of TB incidence and healthcare utilization per income quintile. For example, if we denoted  $a_J$  and  $b_J$  the relative risk of TB infection across income quintiles and the relative ratio of healthcare utilization across income quintiles (table 2 in the main text), respectively, we would have:  $AP_J = a_J * b_J / (\sum_{j=1}^5 a_j * b_j)$ .

$TxC_J$  in equation (1) was estimated separately for both patients on drug-sensitive (DS)-TB care and patients on multi-drug resistance (MDR)-TB care.

Second, for each of the cases as obtained from equation (1), we assigned a household income  $y$ . Subsequently, going through each case, we counted the number of times we had

$c_j > 0.20 * y$  (patient-incurred costs exceeding 20% of total household income). That headcount gave the number of cases of household TB-related catastrophic costs incurred. Untreated TB was not considered in this estimation (equation 1 above) of the number of cases of catastrophic costs. When household costs were assigned to TB-related deaths, those TB-related deaths were allocated between those who were treated and those who were not using case fatality ratios.

## 5. Scenario analyses

**Table S6.** Estimated number of households (in 1,000s) with catastrophic costs averted over 2016-2035 in India and South Africa, when tuberculosis (TB) incidence was equal across all income quintiles, for: expansion of access to care; improvement in drug-sensitive (DS) tuberculosis (TB) care; and improvement in multi-drug resistance (MDR) TB care; as compared with the base-case. In parentheses are indicated the 95% uncertainty ranges.

### a) Harvard model

#### India

| Intervention                      | Total              | Income quintile I  | Income quintile II | Income quintile III | Income quintile IV | Income quintile V |
|-----------------------------------|--------------------|--------------------|--------------------|---------------------|--------------------|-------------------|
| <i>Improvement in DS-TB care</i>  | 750<br>(583 - 913) | 185<br>(173 - 195) | 236<br>(183 - 276) | 151<br>(101 - 209)  | 114<br>(74 - 161)  | 64<br>(39 - 92)   |
| <i>Improvement in MDR-TB care</i> | 85<br>(61 - 109)   | 21<br>(18 - 22)    | 24<br>(16 - 32)    | 17<br>(9 - 28)      | 14<br>(6 - 23)     | 8<br>(3 - 15)     |

#### South Africa

| Intervention                       | Total             | Income quintile I | Income quintile II | Income quintile III | Income quintile IV | Income quintile V |
|------------------------------------|-------------------|-------------------|--------------------|---------------------|--------------------|-------------------|
| <i>Expansion of access to care</i> | 87<br>(41 - 131)  | 45<br>(16 - 72)   | 8<br>(-4 - 23)     | 27<br>(13 - 41)     | 8<br>(0 - 21)      | 0<br>(0 - 0)      |
| <i>Improvement in DS-TB care</i>   | 115<br>(84 - 148) | 85<br>(63 - 108)  | 13<br>(6 - 21)     | 14<br>(6 - 23)      | 3<br>(0 - 8)       | 0<br>(0 - 0)      |
| <i>Improvement in MDR-TB care</i>  | 121<br>(91 - 154) | 86<br>(65 - 107)  | 17<br>(10 - 25)    | 16<br>(8 - 25)      | 3<br>(0 - 8)       | 0<br>(0 - 0)      |

Note: catastrophic costs are defined as total costs exceeding 20% of total household income. All values are in 1,000s; 95% uncertainty ranges are indicated in parentheses.

## b) TIME model

### India

| Intervention                      | Total                | Income quintile I  | Income quintile II | Income quintile III | Income quintile IV | Income quintile V |
|-----------------------------------|----------------------|--------------------|--------------------|---------------------|--------------------|-------------------|
| <i>Improvement in DS-TB care</i>  | 1085<br>(864 - 1312) | 156<br>(150 - 161) | 275<br>(232 - 301) | 300<br>(227 - 370)  | 223<br>(153 - 305) | 131<br>(87 - 189) |
| <i>Improvement in MDR-TB care</i> | 137<br>(120 - 153)   | 44<br>(37 - 50)    | 42<br>(37 - 47)    | 28<br>(21 - 35)     | 16<br>(9 - 23)     | 6<br>(2 - 11)     |

### South Africa

| Intervention                       | Total             | Income quintile I | Income quintile II | Income quintile III | Income quintile IV | Income quintile V |
|------------------------------------|-------------------|-------------------|--------------------|---------------------|--------------------|-------------------|
| <i>Expansion of access to care</i> | 126<br>(95 - 158) | 96<br>(71 - 121)  | 14<br>(4 - 24)     | 13<br>(5 - 21)      | 3<br>(-2 - 13)     | 0<br>(0 - 0)      |
| <i>Improvement in DS-TB care</i>   | 52<br>(38 - 66)   | 38<br>(27 - 49)   | 8<br>(4 - 14)      | 4<br>(1 - 8)        | 2<br>(0 - 5)       | 0<br>(0 - 0)      |
| <i>Improvement in MDR-TB care</i>  | 53<br>(42 - 65)   | 29<br>(21 - 37)   | 17<br>(11 - 23)    | 4<br>(1 - 7)        | 4<br>(1 - 7)       | 0<br>(0 - 0)      |

Note: catastrophic costs are defined as total costs exceeding 20% of total household income. All values are in 1,000s; 95% uncertainty ranges are indicated in parentheses.

**Table S7.** Estimated number of households (in 1,000s) with catastrophic costs averted over 2016-2035 in India and South Africa when healthcare utilization was equalized across all income quintiles, for: expansion of access to care; improvement in drug-sensitive (DS) tuberculosis (TB) care; and improvement in multi-drug resistance (MDR) TB care; as compared with the base-case. In parentheses are indicated the 95% uncertainty ranges.

**a) Harvard model**

**India**

| Intervention                      | Total                 | Income quintile I  | Income quintile II | Income quintile III | Income quintile IV | Income quintile V |
|-----------------------------------|-----------------------|--------------------|--------------------|---------------------|--------------------|-------------------|
| <i>Improvement in DS-TB care</i>  | 1531<br>(1333 - 1705) | 939<br>(874 - 973) | 408<br>(323 - 494) | 130<br>(86 - 175)   | 45<br>(30 - 63)    | 10<br>(4 - 16)    |
| <i>Improvement in MDR-TB care</i> | 184<br>(158 - 209)    | 115<br>(106 - 121) | 49<br>(36 - 63)    | 14<br>(7 - 23)      | 5<br>(1 - 9)       | 1<br>(0 - 3)      |

**South Africa**

| Intervention                       | Total              | Income quintile I  | Income quintile II | Income quintile III | Income quintile IV | Income quintile V |
|------------------------------------|--------------------|--------------------|--------------------|---------------------|--------------------|-------------------|
| <i>Expansion of access to care</i> | 92<br>(43 - 141)   | 47<br>(-3 - 96)    | 16<br>(-1 - 35)    | 28<br>(15 - 41)     | 2<br>(-3 - 11)     | 0<br>(-1 - 1)     |
| <i>Improvement in DS-TB care</i>   | 274<br>(226 - 321) | 226<br>(190 - 261) | 30<br>(19 - 43)    | 15<br>(7 - 23)      | 2<br>(0 - 7)       | 0<br>(0 - 1)      |
| <i>Improvement in MDR-TB care</i>  | 268<br>(222 - 315) | 219<br>(183 - 254) | 30<br>(19 - 43)    | 16<br>(8 - 24)      | 3<br>(0 - 7)       | 0<br>(0 - 1)      |

Note: catastrophic costs are defined as total costs exceeding 20% of total household income. All values are in 1,000s; 95% uncertainty ranges are indicated in parentheses.

## b) TIME model

### India

| Intervention                      | Total                 | Income quintile I  | Income quintile II | Income quintile III | Income quintile IV | Income quintile V |
|-----------------------------------|-----------------------|--------------------|--------------------|---------------------|--------------------|-------------------|
| <i>Improvement in DS-TB care</i>  | 1815<br>(1652 - 1944) | 863<br>(855 - 870) | 542<br>(493 - 568) | 297<br>(217 - 366)  | 95<br>(66 - 126)   | 17<br>(8 - 30)    |
| <i>Improvement in MDR-TB care</i> | 152<br>(137 - 165)    | 64<br>(58 - 70)    | 44<br>(38 - 48)    | 31<br>(23 - 37)     | 11<br>(6 - 17)     | 2<br>(0 - 5)      |

### South Africa

| Intervention                       | Total              | Income quintile I  | Income quintile II | Income quintile III | Income quintile IV | Income quintile V |
|------------------------------------|--------------------|--------------------|--------------------|---------------------|--------------------|-------------------|
| <i>Expansion of access to care</i> | 226<br>(165 - 291) | 164<br>(121 - 208) | 25<br>(10 - 42)    | 29<br>(17 - 42)     | 9<br>(0 - 21)      | 0<br>(-1 - 1)     |
| <i>Improvement in DS-TB care</i>   | 94<br>(73 - 117)   | 68<br>(52 - 85)    | 15<br>(8 - 22)     | 8<br>(3 - 14)       | 3<br>(0 - 7)       | 0<br>(0 - 1)      |
| <i>Improvement in MDR-TB care</i>  | 68<br>(54 - 83)    | 41<br>(31 - 53)    | 17<br>(10 - 23)    | 6<br>(2 - 11)       | 4<br>(1 - 9)       | 0<br>(0 - 1)      |

Note: catastrophic costs are defined as total costs exceeding 20% of total household income. All values are in 1,000s; 95% uncertainty ranges are indicated in parentheses.

**Table S8.** Estimated number of households (in 1,000s) with catastrophic costs averted over 2016-2035 in India and South Africa, without TB-related deaths funeral costs, for: expansion of access to care; improvements in drug-sensitive (DS) tuberculosis (TB) care; and improvement in multi-drug resistance (MDR) TB care; as compared with the base-case. In parentheses are indicated the 95% uncertainty ranges.

**a) Harvard model**

**India**

| Intervention                      | Total                | Income quintile I  | Income quintile II | Income quintile III | Income quintile IV | Income quintile V |
|-----------------------------------|----------------------|--------------------|--------------------|---------------------|--------------------|-------------------|
| <i>Improvement in DS-TB care</i>  | 1121<br>(908 - 1311) | 450<br>(429 - 464) | 357<br>(265 - 433) | 208<br>(136 - 276)  | 80<br>(52 - 115)   | 26<br>(13 - 41)   |
| <i>Improvement in MDR-TB care</i> | 120<br>(93 - 147)    | 47<br>(42 - 50)    | 42<br>(28 - 55)    | 26<br>(14 - 38)     | 9<br>(4 - 16)      | 3<br>(0 - 7)      |

**South Africa**

| Intervention                       | Total              | Income quintile I  | Income quintile II | Income quintile III | Income quintile IV | Income quintile V |
|------------------------------------|--------------------|--------------------|--------------------|---------------------|--------------------|-------------------|
| <i>Expansion of access to care</i> | 83<br>(41 - 125)   | 43<br>(3 - 83)     | 8<br>(-6 - 22)     | 28<br>(15 - 42)     | 4<br>(0 - 13)      | 0<br>(0 - 0)      |
| <i>Improvement in DS-TB care</i>   | 229<br>(186 - 272) | 188<br>(155 - 221) | 25<br>(15 - 35)    | 15<br>(7 - 24)      | 1<br>(0 - 5)       | 0<br>(0 - 0)      |
| <i>Improvement in MDR-TB care</i>  | 229<br>(188 - 271) | 187<br>(155 - 218) | 26<br>(16 - 37)    | 15<br>(7 - 24)      | 1<br>(0 - 5)       | 0<br>(0 - 0)      |

Note: catastrophic costs are defined as total costs exceeding 20% of total household income. All values are in 1,000s; 95% uncertainty ranges are indicated in parentheses.

## b) TIME model

### India

| Intervention                      | Total                 | Income quintile I  | Income quintile II | Income quintile III | Income quintile IV | Income quintile V |
|-----------------------------------|-----------------------|--------------------|--------------------|---------------------|--------------------|-------------------|
| <i>Improvement in DS-TB care</i>  | 1449<br>(1221 - 1623) | 385<br>(379 - 390) | 443<br>(386 - 478) | 392<br>(289 - 467)  | 169<br>(118 - 221) | 60<br>(37 - 85)   |
| <i>Improvement in MDR-TB care</i> | 149<br>(135 - 163)    | 72<br>(67 - 76)    | 42<br>(35 - 47)    | 24<br>(17 - 30)     | 9<br>(4 - 14)      | 3<br>(0 - 6)      |

### South Africa

| Intervention                       | Total              | Income quintile I  | Income quintile II | Income quintile III | Income quintile IV | Income quintile V |
|------------------------------------|--------------------|--------------------|--------------------|---------------------|--------------------|-------------------|
| <i>Expansion of access to care</i> | 250<br>(179 - 319) | 186<br>(135 - 236) | 37<br>(19 - 56)    | 21<br>(10 - 32)     | 7<br>(0 - 17)      | 0<br>(0 - 0)      |
| <i>Improvement in DS-TB care</i>   | 90<br>(68 - 112)   | 68<br>(52 - 86)    | 13<br>(7 - 21)     | 7<br>(3 - 13)       | 1<br>(0 - 4)       | 0<br>(0 - 0)      |
| <i>Improvement in MDR-TB care</i>  | 79<br>(65 - 94)    | 56<br>(46 - 68)    | 15<br>(9 - 22)     | 7<br>(3 - 12)       | 1<br>(0 - 3)       | 0<br>(0 - 0)      |

Note: catastrophic costs are defined as total costs exceeding 20% of total household income. All values are in 1,000s; 95% uncertainty ranges are indicated in parentheses.



**Table S9.** Estimated number of households (in 1,000s) with catastrophic costs averted over 2016-2035 in India and South Africa, when indirect costs are equal across income quintiles, for: expansion of access to care; improvement in drug-sensitive (DS) tuberculosis (TB) care; and improvement in multi-drug resistance (MDR) TB care; as compared with the base-case. In parentheses are indicated the 95% uncertainty ranges.

**a) Harvard model**

**India**

| Intervention                      | Total                | Income quintile I  | Income quintile II | Income quintile III | Income quintile IV | Income quintile V |
|-----------------------------------|----------------------|--------------------|--------------------|---------------------|--------------------|-------------------|
| <i>Improvement in DS-TB care</i>  | 1060<br>(855 - 1264) | 434<br>(414 - 450) | 345<br>(261 - 428) | 199<br>(120 - 277)  | 62<br>(35 - 94)    | 19<br>(10 - 32)   |
| <i>Improvement in MDR-TB care</i> | 122<br>(94 - 151)    | 47<br>(43 - 50)    | 41<br>(28 - 54)    | 25<br>(13 - 37)     | 7<br>(2 - 14)      | 2<br>(0 - 6)      |

**South Africa**

| Intervention                       | Total              | Income quintile I  | Income quintile II | Income quintile III | Income quintile IV | Income quintile V |
|------------------------------------|--------------------|--------------------|--------------------|---------------------|--------------------|-------------------|
| <i>Expansion of access to care</i> | 124<br>(76 - 173)  | 68<br>(28 - 108)   | 24<br>(1 - 55)     | 27<br>(13 - 41)     | 5<br>(0 - 13)      | 0<br>(0 - 0)      |
| <i>Improvement in DS-TB care</i>   | 263<br>(210 - 317) | 215<br>(176 - 234) | 29<br>(16 - 44)    | 17<br>(9 - 27)      | 2<br>(0 - 5)       | 0<br>(0 - 0)      |
| <i>Improvement in MDR-TB care</i>  | 260<br>(211 - 313) | 211<br>(174 - 249) | 30<br>(18 - 45)    | 18<br>(10 - 27)     | 1<br>(0 - 5)       | 0<br>(0 - 0)      |

Note: catastrophic costs are defined as total costs exceeding 20% of total household income. All values are in 1,000s; 95% uncertainty ranges are indicated in parentheses.

## b) TIME model

### India

| Intervention                      | Total                 | Income quintile I  | Income quintile II | Income quintile III | Income quintile IV | Income quintile V |
|-----------------------------------|-----------------------|--------------------|--------------------|---------------------|--------------------|-------------------|
| <i>Improvement in DS-TB care</i>  | 1446<br>(1226 - 1623) | 378<br>(371 - 385) | 474<br>(425 - 502) | 377<br>(284 - 451)  | 173<br>(113 - 233) | 44<br>(19 - 71)   |
| <i>Improvement in MDR-TB care</i> | 138<br>(123 - 152)    | 60<br>(52 - 68)    | 43<br>(37 - 48)    | 24<br>(17 - 30)     | 10<br>(5 - 15)     | 2<br>(0 - 5)      |

### South Africa

| Intervention                       | Total              | Income quintile I  | Income quintile II | Income quintile III | Income quintile IV | Income quintile V |
|------------------------------------|--------------------|--------------------|--------------------|---------------------|--------------------|-------------------|
| <i>Expansion of access to care</i> | 221<br>(171 - 272) | 193<br>(152 - 232) | 19<br>(6 - 34)     | 8<br>(1 - 17)       | 1<br>(-1 - 4)      | 0<br>(0 - 0)      |
| <i>Improvement in DS-TB care</i>   | 98<br>(78 - 118)   | 82<br>(65 - 99)    | 10<br>(5 - 16)     | 5<br>(2 - 10)       | 0<br>(0 - 2)       | 0<br>(0 - 0)      |
| <i>Improvement in MDR-TB care</i>  | 76<br>(62 - 91)    | 55<br>(43 - 97)    | 14<br>(9 - 20)     | 7<br>(3 - 12)       | 0<br>(0 - 2)       | 0<br>(0 - 0)      |

Note: catastrophic costs are defined as total costs exceeding 20% of total household income. All values are in 1,000s; 95% uncertainty ranges are indicated in parentheses.

**Table S10.** Estimated number of households (in 1,000s) with catastrophic costs averted over 2016-2035 in India and South Africa, when the catastrophic costs threshold was set at 10% of total household income, for: expansion of access to care; improvement in drug-sensitive (DS) tuberculosis (TB) care; and improvement in multi-drug resistance (MDR) TB care; as compared with the base-case. In parentheses are indicated the 95% uncertainty ranges.

**a) Harvard model**

**India**

| Intervention                      | Total                 | Income quintile I  | Income quintile II | Income quintile III | Income quintile IV | Income quintile V |
|-----------------------------------|-----------------------|--------------------|--------------------|---------------------|--------------------|-------------------|
| <i>Improvement in DS-TB care</i>  | 1909<br>(1704 - 2076) | 434<br>(424 - 445) | 580<br>(562 - 593) | 528<br>(444 - 589)  | 275<br>(192 - 348) | 91<br>(61 - 124)  |
| <i>Improvement in MDR-TB care</i> | 233<br>(205 - 257)    | 49<br>(47 - 50)    | 70<br>(64 - 73)    | 66<br>(54 - 76)     | 33<br>(21 - 45)    | 11<br>(5 - 18)    |

**South Africa**

| Intervention                       | Total              | Income quintile I  | Income quintile II | Income quintile III | Income quintile IV | Income quintile V |
|------------------------------------|--------------------|--------------------|--------------------|---------------------|--------------------|-------------------|
| <i>Expansion of access to care</i> | 170<br>(105 - 236) | 26<br>(-28 - 78)   | 93<br>(48 - 143)   | 37<br>(15 - 59)     | 4<br>(-8 - 16)     | 9<br>(3 - 16)     |
| <i>Improvement in DS-TB care</i>   | 517<br>(427 - 603) | 354<br>(304 - 400) | 96<br>(66 - 128)   | 47<br>(31 - 63)     | 16<br>(9 - 25)     | 4<br>(0 - 8)      |
| <i>Improvement in MDR-TB care</i>  | 503<br>(418 - 586) | 343<br>(295 - 387) | 94<br>(65 - 126)   | 47<br>(32 - 63)     | 15<br>(8 - 24)     | 4<br>(0 - 8)      |

Note: catastrophic costs are defined as total costs exceeding 10% of total household income. All values are in 1,000s; 95% uncertainty ranges are indicated in parentheses.

**b) TIME model**

**India**

| Intervention                      | Total                 | Income quintile I  | Income quintile II | Income quintile III | Income quintile IV | Income quintile V  |
|-----------------------------------|-----------------------|--------------------|--------------------|---------------------|--------------------|--------------------|
| <i>Improvement in DS-TB care</i>  | 2049<br>(1931 - 2140) | 371<br>(363 - 378) | 517<br>(511 - 522) | 580<br>(562 - 587)  | 380<br>(322 - 420) | 203<br>(156 - 250) |
| <i>Improvement in MDR-TB care</i> | 149<br>(135 - 162)    | 48<br>(39 - 57)    | 42<br>(37 - 47)    | 32<br>(28 - 35)     | 19<br>(14 - 22)    | 9<br>(4 - 13)      |

**South Africa**

| Intervention                       | Total              | Income quintile I  | Income quintile II | Income quintile III | Income quintile IV | Income quintile V |
|------------------------------------|--------------------|--------------------|--------------------|---------------------|--------------------|-------------------|
| <i>Expansion of access to care</i> | 446<br>(382 - 505) | 263<br>(230 - 296) | 130<br>(86 - 172)  | 39<br>(24 - 56)     | 10<br>(3 - 18)     | 4<br>(0 - 9)      |
| <i>Improvement in DS-TB care</i>   | 188<br>(159 - 217) | 128<br>(111 - 145) | 38<br>(25 - 53)    | 17<br>(10 - 24)     | 5<br>(1 - 9)       | 1<br>(0 - 3)      |
| <i>Improvement in MDR-TB care</i>  | 116<br>(98 - 133)  | 72<br>(60 - 83)    | 27<br>(18 - 36)    | 15<br>(9 - 21)      | 3<br>(0 - 6)       | 0<br>(0 - 2)      |

Note: catastrophic costs are defined as total costs exceeding 10% of total household income. All values are in 1,000s; 95% uncertainty ranges are indicated in parentheses.

**Table S11.** Estimated number of households (in 1,000s) with catastrophic costs averted over 2016-2035 in India and South Africa, when the catastrophic costs threshold was set at 40% of total household income, for: expansion of access to care; improvement in drug-sensitive (DS) tuberculosis (TB) care; and improvement in multi-drug resistance (MDR) TB care; as compared with the base-case. In parentheses are indicated the 95% uncertainty ranges.

**a) Harvard model**

**India**

| Intervention                      | Total              | Income quintile I  | Income quintile II | Income quintile III | Income quintile IV | Income quintile V |
|-----------------------------------|--------------------|--------------------|--------------------|---------------------|--------------------|-------------------|
| <i>Improvement in DS-TB care</i>  | 439<br>(334 - 536) | 279<br>(225 - 320) | 104<br>(63 - 144)  | 42<br>(28 - 60)     | 10<br>(4 - 17)     | 5<br>(0 - 15)     |
| <i>Improvement in MDR-TB care</i> | 46<br>(31 - 62)    | 28<br>(19 - 36)    | 12<br>(5 - 2-)     | 5<br>(1 - 10)       | 1<br>(0 - 4)       | 1<br>(0 - 13)     |

**South Africa**

| Intervention                       | Total           | Income quintile I | Income quintile II | Income quintile III | Income quintile IV | Income quintile V |
|------------------------------------|-----------------|-------------------|--------------------|---------------------|--------------------|-------------------|
| <i>Expansion of access to care</i> | 39<br>(14 - 63) | 36<br>(11 - 59)   | 4<br>(-2 - 11)     | -1<br>(-3 - 2)      | 0<br>(-1 - 1)      | 0<br>(0 - 0)      |
| <i>Improvement in DS-TB care</i>   | 75<br>(56 - 95) | 69<br>(51 - 88)   | 5<br>(1 - 9)       | 1<br>(0 - 3)        | 0<br>(0 - 1)       | 0<br>(0 - 0)      |
| <i>Improvement in MDR-TB care</i>  | 78<br>(59 - 99) | 71<br>(54 - 90)   | 5<br>(2 - 10)      | 1<br>(0 - 4)        | 0<br>(0 - 1)       | 0<br>(0 - 0)      |

Note: catastrophic costs are defined as total costs exceeding 40% of total household income. All values are in 1,000s; 95% uncertainty ranges are indicated in parentheses.

**b) TIME model**

**India**

| Intervention                      | Total              | Income quintile I  | Income quintile II | Income quintile III | Income quintile IV | Income quintile V |
|-----------------------------------|--------------------|--------------------|--------------------|---------------------|--------------------|-------------------|
| <i>Improvement in DS-TB care</i>  | 663<br>(502 - 823) | 328<br>(289 - 358) | 202<br>(127 - 273) | 93<br>(51 - 142)    | 34<br>(19 - 53)    | 6<br>(2 - 12)     |
| <i>Improvement in MDR-TB care</i> | 100<br>(84 - 115)  | 64<br>(57 - 71)    | 26<br>(17 - 34)    | 8<br>(3 - 14)       | 2<br>(0 - 5)       | 0<br>(0 - 2)      |

**South Africa**

| Intervention                       | Total            | Income quintile I | Income quintile II | Income quintile III | Income quintile IV | Income quintile V |
|------------------------------------|------------------|-------------------|--------------------|---------------------|--------------------|-------------------|
| <i>Expansion of access to care</i> | 76<br>(48 - 107) | 71<br>(45 - 99)   | 4<br>(-1 - 11)     | 0<br>(-2 - 4)       | 0<br>(-1 - 1)      | 0<br>(0 - 0)      |
| <i>Improvement in DS-TB care</i>   | 31<br>(20 - 42)  | 27<br>(17-38)     | 2<br>(0 - 5)       | 1<br>(0 - 3)        | 0<br>(0 - 1)       | 0<br>(0 - 0)      |
| <i>Improvement in MDR-TB care</i>  | 35<br>(25 - 46)  | 30<br>(21 - 39)   | 4<br>(1 - 8)       | 2<br>(0 - 4)        | 0<br>(0 - 1)       | 0<br>(0 - 0)      |

Note: catastrophic costs are defined as total costs exceeding 40% of total household income. All values are in 1,000s; 95% uncertainty ranges are indicated in parentheses.

**Table S12.** Estimated number of households (in 1,000s) with catastrophic costs averted over 2016-2035 in India and South Africa, when the catastrophic costs threshold varies by income quintile (20%, 25%, 30%, 35%, and 40% respectively) for: expansion of access to care; improvement in drug-sensitive (DS) tuberculosis (TB) care; and improvement in multi-drug resistance (MDR) TB care; as compared with the base-case. In parentheses are indicated the 95% uncertainty ranges.

**a) Harvard model**

**India**

| Intervention                      | Total              | Income quintile I  | Income quintile II | Income quintile III | Income quintile IV | Income quintile V |
|-----------------------------------|--------------------|--------------------|--------------------|---------------------|--------------------|-------------------|
| <i>Improvement in DS-TB care</i>  | 808<br>(669 - 940) | 430<br>(403 - 449) | 246<br>(174 - 318) | 118<br>(75 - 159)   | 12<br>(6 - 21)     | 2<br>(0 - 8)      |
| <i>Improvement in MDR-TB care</i> | 91<br>(71 - 112)   | 47<br>(42 - 50)    | 29<br>(17 - 41)    | 14<br>(7 - 23)      | 1<br>(0 - 4)       | 0<br>(0 - 2)      |

**South Africa**

| Intervention                       | Total              | Income quintile I  | Income quintile II | Income quintile III | Income quintile IV | Income quintile V |
|------------------------------------|--------------------|--------------------|--------------------|---------------------|--------------------|-------------------|
| <i>Expansion of access to care</i> | 59<br>(20 - 99)    | 47<br>(9 - 85)     | 12<br>(1 - 24)     | 0<br>(-3 - 4)       | 0<br>(-1 - 1)      | 0<br>(0 - 0)      |
| <i>Improvement in DS-TB care</i>   | 201<br>(163 - 240) | 184<br>(148 - 219) | 16<br>(9 - 25)     | 1<br>(0 - 4)        | 0<br>(0 - 1)       | 0<br>(0 - 0)      |
| <i>Improvement in MDR-TB care</i>  | 200<br>(162 - 237) | 181<br>(146 - 215) | 17<br>(10 - 26)    | 2<br>(0 - 5)        | 0<br>(0 - 1)       | 0<br>(0 - 0)      |

Note: all values are in 1,000s; 95% uncertainty ranges are indicated in parentheses.

**b) TIME model**

**India**

| Intervention                      | Total               | Income quintile I  | Income quintile II | Income quintile III | Income quintile IV | Income quintile V |
|-----------------------------------|---------------------|--------------------|--------------------|---------------------|--------------------|-------------------|
| <i>Improvement in DS-TB care</i>  | 985<br>(821 - 1138) | 380<br>(372 - 386) | 399<br>(321 - 458) | 151<br>(87 - 226)   | 53<br>(30 - 76)    | 3<br>(0 - 8)      |
| <i>Improvement in MDR-TB care</i> | 119<br>(106 - 133)  | 64<br>(57 - 70)    | 39<br>(32 - 46)    | 12<br>(6 - 19)      | 3<br>(0 - 7)       | 0<br>(0 - 1)      |

**South Africa**

| Intervention                       | Total              | Income quintile I  | Income quintile II | Income quintile III | Income quintile IV | Income quintile V |
|------------------------------------|--------------------|--------------------|--------------------|---------------------|--------------------|-------------------|
| <i>Expansion of access to care</i> | 198<br>(161 - 237) | 164<br>(133 - 197) | 30<br>(18 - 44)    | 3<br>(-2 - 13)      | 0<br>(-1 - 1)      | 0<br>(0 - 0)      |
| <i>Improvement in DS-TB care</i>   | 79<br>(62 - 97)    | 68<br>(53 - 83)    | 10<br>(4 - 16)     | 2<br>(0 - 5)        | 0<br>(0 - 1)       | 0<br>(0 - 0)      |
| <i>Improvement in MDR-TB care</i>  | 63<br>(49 - 76)    | 49<br>(38 - 60)    | 11<br>(6 - 17)     | 2<br>(0 - 5)        | 0<br>(0 - 1)       | 0<br>(0 - 0)      |

Note: all values are in 1,000s; 95% uncertainty ranges are indicated in parentheses.



## 6. Univariate sensitivity analyses

**Table S13.** Estimated number of households (in 1,000s) with catastrophic costs averted over 2016-2035 in India and South Africa, with 50% lower direct costs, for: expansion of access to care; improvement in drug sensitive (DS) tuberculosis (TB) care; and improvement in multi-drug resistance (MDR) TB care; as compared with the base-case. In parentheses are indicated the 95% uncertainty ranges.

### a) Harvard model

#### India

| Intervention                      | Total              | Income quintile I  | Income quintile II | Income quintile III | Income quintile IV | Income quintile V |
|-----------------------------------|--------------------|--------------------|--------------------|---------------------|--------------------|-------------------|
| <i>Improvement in DS-TB care</i>  | 398<br>(306 - 507) | 265<br>(222 - 311) | 79<br>(48 - 116)   | 36<br>(18 - 63)     | 15<br>(7 - 24)     | 3<br>(0 - 8)      |
| <i>Improvement in MDR-TB care</i> | 41<br>(27 - 57)    | 27<br>(19 - 35)    | 8<br>(3 - 15)      | 4<br>(0 - 10)       | 2<br>(0 - 5)       | 0<br>(0 - 2)      |

#### South Africa

| Intervention                       | Total              | Income quintile I  | Income quintile II | Income quintile III | Income quintile IV | Income quintile V |
|------------------------------------|--------------------|--------------------|--------------------|---------------------|--------------------|-------------------|
| <i>Expansion of access to care</i> | 21<br>(-12 - 55)   | 5<br>(-26 - 36)    | 16<br>(5 - 27)     | 1<br>(-3 - 7)       | 0<br>(-1 - 1)      | 0<br>(0 - 0)      |
| <i>Improvement in DS-TB care</i>   | 143<br>(116 - 173) | 129<br>(104 - 155) | 12<br>(6 - 20)     | 2<br>(0 - 5)        | 0<br>(0 - 1)       | 0<br>(0 - 0)      |
| <i>Improvement in MDR-TB care</i>  | 142<br>(115 - 171) | 127<br>(103 - 153) | 13<br>(6 - 20)     | 2<br>(0 - 6)        | 0<br>(0 - 1)       | 0<br>(0 - 0)      |

Note: catastrophic costs are defined as total costs exceeding 20% of total household income. All values are in 1,000s; 95% uncertainty ranges are indicated in parentheses.

## b) TIME model

### India

| Intervention                      | Total              | Income quintile I  | Income quintile II | Income quintile III | Income quintile IV | Income quintile V |
|-----------------------------------|--------------------|--------------------|--------------------|---------------------|--------------------|-------------------|
| <i>Improvement in DS-TB care</i>  | 628<br>(480 - 775) | 313<br>(268 - 348) | 218<br>(156 - 273) | 62<br>(28 - 109)    | 31<br>(16 - 49)    | 5<br>(1 - 10)     |
| <i>Improvement in MDR-TB care</i> | 92<br>(77 - 108)   | 57<br>(49 - 65)    | 26<br>(18 - 34)    | 7<br>(2 - 12)       | 2<br>(0 - 5)       | 0<br>(0 - 1)      |

### South Africa

| Intervention                       | Total             | Income quintile I | Income quintile II | Income quintile III | Income quintile IV | Income quintile V |
|------------------------------------|-------------------|-------------------|--------------------|---------------------|--------------------|-------------------|
| <i>Expansion of access to care</i> | 130<br>(97 - 162) | 112<br>(85 - 139) | 16<br>(6 - 27)     | 2<br>(-2 - 8)       | 0<br>(-1 - 1)      | 0<br>(0 - 0)      |
| <i>Improvement in DS-TB care</i>   | 47<br>(33 - 61)   | 40<br>(28 - 53)   | 5<br>(1 - 10)      | 2<br>(0 - 4)        | 0<br>(0 - 1)       | 0<br>(0 - 0)      |
| <i>Improvement in MDR-TB care</i>  | 43<br>(31 - 55)   | 33<br>(24 - 44)   | 7<br>(2 - 12)      | 2<br>(0 - 5)        | 0<br>(0 - 1)       | 0<br>(0 - 0)      |

Note: catastrophic costs are defined as total costs exceeding 20% of total household income. All values are in 1,000s; 95% uncertainty ranges are indicated in parentheses.

**Table S14.** Estimated number of households (in 1,000s) with catastrophic costs averted over 2016-2035 in India and South Africa, with 50% higher direct costs, for: expansion of access to care; improvement in drug sensitive (DS) tuberculosis (TB) care; and improvement in multi-drug resistance (MDR) TB care; as compared with the base-case. In parentheses are indicated the 95% uncertainty ranges.

**a) Harvard model**

**India**

| Intervention                      | Total                 | Income quintile I  | Income quintile II | Income quintile III | Income quintile IV | Income quintile V |
|-----------------------------------|-----------------------|--------------------|--------------------|---------------------|--------------------|-------------------|
| <i>Improvement in DS-TB care</i>  | 1546<br>(1303 - 1753) | 452<br>(441 - 462) | 504<br>(435 - 553) | 402<br>(299 - 493)  | 145<br>(92 - 199)  | 43<br>(22 - 66)   |
| <i>Improvement in MDR-TB care</i> | 183<br>(150 - 212)    | 49<br>(47 - 51)    | 61<br>(50 - 69)    | 51<br>(35 - 65)     | 17<br>(9 - 27)     | 5<br>(1 - 10)     |

**South Africa**

| Intervention                       | Total              | Income quintile I  | Income quintile II | Income quintile III | Income quintile IV | Income quintile V |
|------------------------------------|--------------------|--------------------|--------------------|---------------------|--------------------|-------------------|
| <i>Expansion of access to care</i> | 82<br>(33 - 133)   | 35<br>(-6 - 76)    | 12<br>(-9 - 37)    | 7<br>(-9 - 25)      | 28<br>(15 - 40)    | 0<br>(0 - 2)      |
| <i>Improvement in DS-TB care</i>   | 347<br>(287 - 407) | 256<br>(212 - 299) | 53<br>(38 - 71)    | 26<br>(17 - 36)     | 12<br>(5 - 20)     | 0<br>(0 - 1)      |
| <i>Improvement in MDR-TB care</i>  | 342<br>(284 - 402) | 250<br>(207 - 292) | 54<br>(39 - 71)    | 27<br>(18 - 37)     | 11<br>(4 - 19)     | 0<br>(0 - 1)      |

Note: catastrophic costs are defined as total costs exceeding 20% of total household income. All values are in 1,000s; 95% uncertainty ranges are indicated in parentheses.

## b) TIME model

### India

| Intervention                      | Total                 | Income quintile I  | Income quintile II | Income quintile III | Income quintile IV | Income quintile V |
|-----------------------------------|-----------------------|--------------------|--------------------|---------------------|--------------------|-------------------|
| <i>Improvement in DS-TB care</i>  | 1841<br>(1682 - 1982) | 378<br>(371 - 385) | 516<br>(507 - 522) | 529<br>(474 - 571)  | 294<br>(224 - 354) | 124<br>(87 - 165) |
| <i>Improvement in MDR-TB care</i> | 156<br>(143 - 168)    | 61<br>(53 - 68)    | 45<br>(40 - 49)    | 30<br>(25 - 34)     | 15<br>(10 - 20)    | 5<br>(2 - 9)      |

### South Africa

| Intervention                       | Total              | Income quintile I  | Income quintile II | Income quintile III | Income quintile IV | Income quintile V |
|------------------------------------|--------------------|--------------------|--------------------|---------------------|--------------------|-------------------|
| <i>Expansion of access to care</i> | 300<br>(213 - 381) | 210<br>(152 - 263) | 54<br>(25 - 83)    | 22<br>(10 - 35)     | 14<br>(4 - 25)     | 0<br>(0 - 0)      |
| <i>Improvement in DS-TB care</i>   | 119<br>(92 - 145)  | 84<br>(64 - 103)   | 19<br>(11 - 29)    | 13<br>(7 - 20)      | 3<br>(0 - 6)       | 0<br>(0 - 0)      |
| <i>Improvement in MDR-TB care</i>  | 91<br>(75 - 107)   | 57<br>(45 - 69)    | 20<br>(14 - 27)    | 12<br>(7 - 18)      | 1<br>(0 - 4)       | 0<br>(0 - 0)      |

Note: catastrophic costs are defined as total costs exceeding 20% of total household income. All values are in 1,000s; 95% uncertainty ranges are indicated in parentheses.

**Table S15.** Estimated number of households (in 1,000s) with catastrophic costs averted over 2016-2035 in India and South Africa, with 50% lower funeral costs, for: expansion of access to care; improvement in drug sensitive (DS) tuberculosis (TB) care; and improvement in multi-drug resistance (MDR) TB care; as compared with the base-case. In parentheses are indicated the 95% uncertainty ranges.

**a) Harvard model**

**India**

| Intervention                      | Total                | Income quintile I  | Income quintile II | Income quintile III | Income quintile IV | Income quintile V |
|-----------------------------------|----------------------|--------------------|--------------------|---------------------|--------------------|-------------------|
| <i>Improvement in DS-TB care</i>  | 1087<br>(888 - 1294) | 423<br>(392 - 447) | 349<br>(265 - 433) | 212<br>(152 - 278)  | 80<br>(54 - 112)   | 23<br>(10 - 37)   |
| <i>Improvement in MDR-TB care</i> | 124<br>(96 - 152)    | 45<br>(39 - 49)    | 41<br>(28 - 54)    | 26<br>(16 - 38)     | 9<br>(4 - 16)      | 3<br>(0 - 6)      |

**South Africa**

|                                    | Total              | Income quintile I  | Income quintile II | Income quintile III | Income quintile IV | Income quintile V |
|------------------------------------|--------------------|--------------------|--------------------|---------------------|--------------------|-------------------|
| <i>Expansion of access to care</i> | 88<br>(45 - 132)   | 45<br>(10 - 79)    | 16<br>(0 - 35)     | 22<br>(10 - 34)     | 5<br>(-1 - 16)     | 0<br>(0 - 0)      |
| <i>Improvement in DS-TB care</i>   | 198<br>(157 - 242) | 164<br>(132 - 197) | 19<br>(10 - 29)    | 14<br>(6 - 22)      | 2<br>(0 - 6)       | 0<br>(0 - 0)      |
| <i>Improvement in MDR-TB care</i>  | 199<br>(159 - 242) | 163<br>(132 - 196) | 20<br>(11 - 30)    | 14<br>(7 - 22)      | 2<br>(0 - 6)       | 0<br>(0 - 0)      |

Note: catastrophic costs are defined as total costs exceeding 20% of total household income. All values are in 1,000s; 95% uncertainty ranges are indicated in parentheses.

## b) TIME model

### India

| Intervention                      | Total                 | Income quintile I  | Income quintile II | Income quintile III | Income quintile IV | Income quintile V |
|-----------------------------------|-----------------------|--------------------|--------------------|---------------------|--------------------|-------------------|
| <i>Improvement in DS-TB care</i>  | 1477<br>(1267 - 1660) | 383<br>(376 - 388) | 465<br>(406 - 501) | 394<br>(305 - 470)  | 176<br>(126 - 236) | 59<br>(37 - 82)   |
| <i>Improvement in MDR-TB care</i> | 148<br>(133 - 161)    | 68<br>(62 - 73)    | 43<br>(38 - 48)    | 24<br>(18 - 31)     | 10<br>(5 - 15)     | 2<br>(0 - 6)      |

### South Africa

| Intervention                       | Total              | Income quintile I  | Income quintile II | Income quintile III | Income quintile IV | Income quintile V |
|------------------------------------|--------------------|--------------------|--------------------|---------------------|--------------------|-------------------|
| <i>Expansion of access to care</i> | 205<br>(158 - 262) | 153<br>(117 - 196) | 22<br>(9 - 37)     | 26<br>(15 - 39)     | 4<br>(-1 - 11)     | 0<br>(0 - 0)      |
| <i>Improvement in DS-TB care</i>   | 86<br>(67 - 107)   | 67<br>(51 - 83)    | 11<br>(5 - 17)     | 8<br>(3 - 14)       | 1<br>(0 - 3)       | 0<br>(0 - 0)      |
| <i>Improvement in MDR-TB care</i>  | 75<br>(62 - 89)    | 53<br>(42 - 64)    | 15<br>(9 - 21)     | 7<br>(3 - 12)       | 0<br>(0 - 2)       | 0<br>(0 - 0)      |

Note: catastrophic costs are defined as total costs exceeding 20% of total household income. All values are in 1,000s; 95% uncertainty ranges are indicated in parentheses.

**Table S16.** Estimated number of households (in 1,000s) with catastrophic costs averted over 2016-2035 in India and South Africa, with 50% higher funeral costs, for: expansion of access to care; improvement in drug sensitive (DS) tuberculosis (TB) care; and improvement in multi-drug resistance (MDR) TB care; as compared with the base-case. In parentheses are indicated the 95% uncertainty ranges.

**a) Harvard model**

**India**

| Intervention                      | Total                | Income quintile I  | Income quintile II | Income quintile III | Income quintile IV | Income quintile V |
|-----------------------------------|----------------------|--------------------|--------------------|---------------------|--------------------|-------------------|
| <i>Improvement in DS-TB care</i>  | 1015<br>(825 - 1216) | 404<br>(371 - 431) | 345<br>(264 - 419) | 164<br>(108 - 233)  | 71<br>(44 - 107)   | 30<br>(19 - 44)   |
| <i>Improvement in MDR-TB care</i> | 117<br>(91 - 146)    | 45<br>(39 - 49)    | 41<br>(28 - 53)    | 20<br>(11 - 32)     | 8<br>(3 - 15)      | 4<br>(0 - 8)      |

**South Africa**

| Intervention                       | Total              | Income quintile I  | Income quintile II | Income quintile III | Income quintile IV | Income quintile V |
|------------------------------------|--------------------|--------------------|--------------------|---------------------|--------------------|-------------------|
| <i>Expansion of access to care</i> | 112<br>(58 - 165)  | 69<br>(27 - 111)   | 18<br>(4 - 34)     | 18<br>(7 - 29)      | 8<br>(0 - 19)      | 0<br>(0 - 0)      |
| <i>Improvement in DS-TB care</i>   | 238<br>(188 - 290) | 201<br>(161 - 242) | 22<br>(13 - 33)    | 12<br>(5 - 20)      | 3<br>(0 - 7)       | 0<br>(0 - 0)      |
| <i>Improvement in MDR-TB care</i>  | 236<br>(187 - 285) | 197<br>(157 - 236) | 23<br>(14 - 34)    | 13<br>(6 - 21)      | 3<br>(0 - 7)       | 0<br>(0 - 0)      |

Note: catastrophic costs are defined as total costs exceeding 20% of total household income. All values are in 1,000s; 95% uncertainty ranges are indicated in parentheses.

## b) TIME model

### India

| Intervention                      | Total                 | Income quintile I  | Income quintile II | Income quintile III | Income quintile IV | Income quintile V |
|-----------------------------------|-----------------------|--------------------|--------------------|---------------------|--------------------|-------------------|
| <i>Improvement in DS-TB care</i>  | 1472<br>(1244 - 1648) | 374<br>(365 - 381) | 472<br>(422 - 502) | 396<br>(313 - 467)  | 180<br>(105 - 242) | 50<br>(24 - 74)   |
| <i>Improvement in MDR-TB care</i> | 133<br>(117 - 149)    | 55<br>(46 - 64)    | 42<br>(35 - 47)    | 24<br>(18 - 30)     | 10<br>(4 - 15)     | 2<br>(0 - 5)      |

### South Africa

| Intervention                       | Total              | Income quintile I  | Income quintile II | Income quintile III | Income quintile IV | Income quintile V |
|------------------------------------|--------------------|--------------------|--------------------|---------------------|--------------------|-------------------|
| <i>Expansion of access to care</i> | 186<br>(150 - 222) | 146<br>(118 - 173) | 18<br>(7 - 30)     | 19<br>(6 - 33)      | 4<br>(-1 - 12)     | 0<br>(0 - 0)      |
| <i>Improvement in DS-TB care</i>   | 85<br>(68 - 103)   | 67<br>(53 - 81)    | 11<br>(5 - 17)     | 6<br>(2 - 12)       | 1<br>(0 - 3)       | 0<br>(0 - 0)      |
| <i>Improvement in MDR-TB care</i>  | 68<br>(54 - 82)    | 47<br>(36 - 58)    | 13<br>(8 - 19)     | 7<br>(3 - 12)       | 1<br>(0 - 2)       | 0<br>(0 - 0)      |

Note: catastrophic costs are defined as total costs exceeding 20% of total household income.  
All values are in 1,000s; 95% uncertainty ranges are indicated in parentheses.



**Table S17.** Estimated number of households (in 1,000s) with catastrophic costs averted over 2016-2035 in India and South Africa, with 50% lower utilization rates, for: expansion of access to care; improvement in drug sensitive (DS) tuberculosis (TB) care; and improvement in multi-drug resistance (MDR) TB care; as compared with the base-case. In parentheses are indicated the 95% uncertainty ranges.

**a) Harvard model**

**India**

| Intervention                      | Total                 | Income quintile I  | Income quintile II | Income quintile III | Income quintile IV | Income quintile V |
|-----------------------------------|-----------------------|--------------------|--------------------|---------------------|--------------------|-------------------|
| <i>Improvement in DS-TB care</i>  | 1414<br>(1214 - 1608) | 824<br>(777 - 857) | 395<br>(299 - 475) | 146<br>(95 - 208)   | 34<br>(19 - 55)    | 16<br>(8 - 25)    |
| <i>Improvement in MDR-TB care</i> | 169<br>(142 - 196)    | 101<br>(93 - 107)  | 46<br>(32 - 59)    | 16<br>(8 - 26)      | 4<br>(1 - 9)       | 2<br>(0 - 5)      |

**South Africa**

| Intervention                       | Total              | Income quintile I  | Income quintile II | Income quintile III | Income quintile IV | Income quintile V |
|------------------------------------|--------------------|--------------------|--------------------|---------------------|--------------------|-------------------|
| <i>Expansion of access to care</i> | 75<br>(30 - 122)   | 43<br>(8 - 79)     | 4<br>(-11 - 20)    | 27<br>(10 - 42)     | 1<br>(-3 - 9)      | 0<br>(-1 - 0)     |
| <i>Improvement in DS-TB care</i>   | 217<br>(173 - 263) | 176<br>(142 - 210) | 26<br>(17 - 38)    | 13<br>(5 - 22)      | 2<br>(0 - 5)       | 0<br>(0 - 0)      |
| <i>Improvement in MDR-TB care</i>  | 214<br>(171 - 259) | 171<br>(138 - 205) | 26<br>(17 - 38)    | 14<br>(6 - 23)      | 2<br>(0 - 5)       | 0<br>(0 - 0)      |

Note: catastrophic costs are defined as total costs exceeding 20% of total household income. All values are in 1,000s; 95% uncertainty ranges are indicated in parentheses.

## b) TIME model

### India

| Intervention                      | Total                 | Income quintile I  | Income quintile II | Income quintile III | Income quintile IV | Income quintile V |
|-----------------------------------|-----------------------|--------------------|--------------------|---------------------|--------------------|-------------------|
| <i>Improvement in DS-TB care</i>  | 1691<br>(1513 - 1837) | 756<br>(745 - 764) | 507<br>(455 - 540) | 296<br>(219 - 362)  | 100<br>(64 - 140)  | 32<br>(17 - 47)   |
| <i>Improvement in MDR-TB care</i> | 146<br>(131 - 160)    | 61<br>(55 - 67)    | 46<br>(40 - 51)    | 26<br>(19 - 32)     | 11<br>(6 - 16)     | 2<br>(0 - 5)      |

### South Africa

| Intervention                       | Total              | Income quintile I  | Income quintile II | Income quintile III | Income quintile IV | Income quintile V |
|------------------------------------|--------------------|--------------------|--------------------|---------------------|--------------------|-------------------|
| <i>Expansion of access to care</i> | 237<br>(192 - 286) | 191<br>(161 - 223) | 28<br>(10 - 52)    | 12<br>(3 - 22)      | 6<br>(-1 - 16)     | 0<br>(-1 - 1)     |
| <i>Improvement in DS-TB care</i>   | 87<br>(68 - 107)   | 70<br>(54 - 86)    | 10<br>(4 - 17)     | 5<br>(1 - 9)        | 2<br>(0 - 6)       | 0<br>(0 - 1)      |
| <i>Improvement in MDR-TB care</i>  | 75<br>(61 - 90)    | 47<br>(36 - 58)    | 18<br>(13 - 25)    | 7<br>(3 - 12)       | 2<br>(0 - 5)       | 0<br>(0 - 1)      |

Note: catastrophic costs are defined as total costs exceeding 20% of total household income.

All values are in 1,000s; 95% uncertainty ranges are indicated in parentheses.

**Table S18.** Estimated number of households (in 1,000s) with catastrophic costs averted over 2016-2035 in India and South Africa, with 50% higher utilization rates, for: expansion of access to care; improvement in drug sensitive (DS) tuberculosis (TB) care; and improvement in multi-drug resistance (MDR) TB care; as compared with the base-case. In parentheses are indicated the 95% uncertainty ranges.

**a) Harvard model**

**India**

| Intervention                      | Total                 | Income quintile I  | Income quintile II | Income quintile III | Income quintile IV | Income quintile V |
|-----------------------------------|-----------------------|--------------------|--------------------|---------------------|--------------------|-------------------|
| <i>Improvement in DS-TB care</i>  | 1401<br>(1215 - 1577) | 808<br>(759 - 835) | 377<br>(291 - 456) | 153<br>(107 - 208)  | 47<br>(31 - 67)    | 15<br>(7 - 25)    |
| <i>Improvement in MDR-TB care</i> | 170<br>(145 - 194)    | 104<br>(96 - 109)  | 45<br>(31 - 57)    | 16<br>(8 - 26)      | 4<br>(1 - 9)       | 1<br>(0 - 4)      |

**South Africa**

| Intervention                       | Total              | Income quintile I  | Income quintile II | Income quintile III | Income quintile IV | Income quintile V |
|------------------------------------|--------------------|--------------------|--------------------|---------------------|--------------------|-------------------|
| <i>Expansion of access to care</i> | 95<br>(50 - 142)   | 72<br>(34 - 112)   | 2<br>(-11 - 16)    | 17<br>(6 - 29)      | 4<br>(-3 - 13)     | 0<br>(-2 - 1)     |
| <i>Improvement in DS-TB care</i>   | 183<br>(142 - 227) | 144<br>(111 - 181) | 24<br>(15 - 33)    | 10<br>(4 - 17)      | 5<br>(1 - 9)       | 0<br>(0 - 2)      |
| <i>Improvement in MDR-TB care</i>  | 186<br>(146 - 229) | 139<br>(106 - 174) | 28<br>(18 - 38)    | 13<br>(6 - 21)      | 6<br>(1 - 11)      | 1<br>(0 - 3)      |

## b) TIME model

### India

| Intervention                      | Total                 | Income quintile I  | Income quintile II | Income quintile III | Income quintile IV | Income quintile V |
|-----------------------------------|-----------------------|--------------------|--------------------|---------------------|--------------------|-------------------|
| <i>Improvement in DS-TB care</i>  | 1401<br>(1215 - 1577) | 808<br>(759 - 835) | 377<br>(291 - 456) | 153<br>(107 - 208)  | 47<br>(31 - 67)    | 15<br>(7 - 25)    |
| <i>Improvement in MDR-TB care</i> | 170<br>(145 - 131)    | 104<br>(96 - 109)  | 45<br>(31 - 57)    | 16<br>(8 - 26)      | 4<br>(1 - 9)       | 1<br>(0 - 4)      |

### South Africa

| Intervention                       | Total              | Income quintile I  | Income quintile II | Income quintile III | Income quintile IV | Income quintile V |
|------------------------------------|--------------------|--------------------|--------------------|---------------------|--------------------|-------------------|
| <i>Expansion of access to care</i> | 95<br>(50 - 142)   | 72<br>(34 - 112)   | 2<br>(-11 - 16)    | 17<br>(6 - 29)      | 4<br>(-3 - 13)     | 0<br>(-2 - 1)     |
| <i>Improvement in DS-TB care</i>   | 183<br>(142 - 227) | 144<br>(111 - 181) | 24<br>(15 - 33)    | 10<br>(4 - 17)      | 5<br>(1 - 9)       | 0<br>(0 - 2)      |
| <i>Improvement in MDR-TB care</i>  | 186<br>(146 - 229) | 139<br>(106 - 174) | 28<br>(18 - 38)    | 13<br>(6 - 21)      | 6<br>(1 - 11)      | 1<br>(0 - 3)      |

Note: catastrophic costs are defined as total costs exceeding 20% of total household income.

All values are in 1,000s; 95% uncertainty ranges are indicated in parentheses.

## References

1. Menzies NA, Cohen T, Lin H-H, et al., Population health impact and cost-effectiveness of tuberculosis diagnosis with Xpert MTB/RIF: a dynamic simulation and economic evaluation. *PLoS Medicine* 2012; 9(11):e1001347.
2. Houben RMGJ, Lalli M, Sumner T, et al. TIME Impact - a new user-friendly TB model to inform TB policy decisions. *BMC Medicine* 2016;14(1):1-10.
3. Houben RMGJ, Menzies NA, Sumner T, et al. Feasibility of achieving the 2025 WHO Global TB Targets in South Africa, China and India: a combined analysis of 11 models. *Lancet Global Health* 2016; 4:e806-815.
4. Menzies NA, Gomez GB, Bozzani F, et al. Cost-effectiveness and resource implications of aggressive TB control in China, India and South Africa: a combined analysis of nine models. *Lancet Global Health* 2016; 4:e816-826.
5. Pantoja A, Floyd K, Unnikrishnan KP, et al. Economic evaluation of public-private mix for tuberculosis care and control, India. Part I. Socio-economic profile and costs among tuberculosis patients. *International Journal of Tuberculosis and Lung Disease* 2009; 13(6):698-704.
6. John KR, Daley P, Kincler N, Oxlade O, Menzies D. Costs incurred by patients with pulmonary tuberculosis in rural India. *International Journal of Tuberculosis and Lung Disease* 2009; 13(10):1281-7.
7. National Tuberculosis Programme. Personal Communication.
8. Foster N, Vassall A, Cleary S, et al. The economic burden of TB diagnosis and treatment in South Africa. *Social Science and Medicine* 2015; 130:e27.
9. Ramma L, Cox H, Wilkinson L, et al. Patients' costs associated with seeking and accessing treatment for drug-resistant tuberculosis in South Africa. *International Journal of Tuberculosis and Lung Disease* 2015; 19(12):1513-9.
10. Hausler HP, Sinanovic E, Kumaranayake L, et al. Costs of measures to control tuberculosis/HIV in public primary care facilities in Cape Town, South Africa. *Bulletin of the World Health Organization* 2006; 84(7):528-36.
